# Supplementary material for: Catalytic Hydroconversion of Model Compounds over Ni/NiO@NC Nanoparticles
Source: MDPI journal article supplement (doi:10.3390/molecules29040755), 2024-02-06

# Supplementary Materials

## Catalytic hydroconversion of model compounds over Ni/NiO@NC nanoparticles

Ting Liu <sup>\*, †</sup>, Yanxi Ma <sup>†</sup>, Yakun Tang, Yue Zhang, Jingmei Liu, Xiaodong Zhou,  
Xiaohui Li and Lang Liu <sup>\*</sup>

State Key Laboratory of Chemistry and Utilization of Carbon Based Energy  
Resources; College of Chemistry, Xinjiang University, Urumqi, 830017, Xinjiang, PR  
China.

<sup>\*</sup> Correspondence: liut [@xju.edu.cn](mailto:@xju.edu.cn) (T.L.); liulang [@xju.edu.cn](mailto:@xju.edu.cn) (L.L.)

<sup>†</sup> These authors contributed equally to this work.

### Content

**Figure S1.** Fitted curves at (a) Ni (b) NiO.

**Figure S2.** XPS survey scans of Ni/NiO@NC<sub>10,000-10-350</sub>.

**Figure S3.** XPS spectra at C 1s regions.

**Figure S4.** SEM-EDS pattern of Ni/NiO@NC<sub>10,000-10-350</sub>.

**Figure S5.** SEM images of the (a)Ni/NiO@NC<sub>8000-10-350</sub>, (b)Ni/NiO@NC<sub>30,000-10-350</sub>,  
(c)Ni/NiO@NC<sub>58,000-10-350</sub>.

**Figure S1.** Fitted curves at (a) Ni (b) NiO.

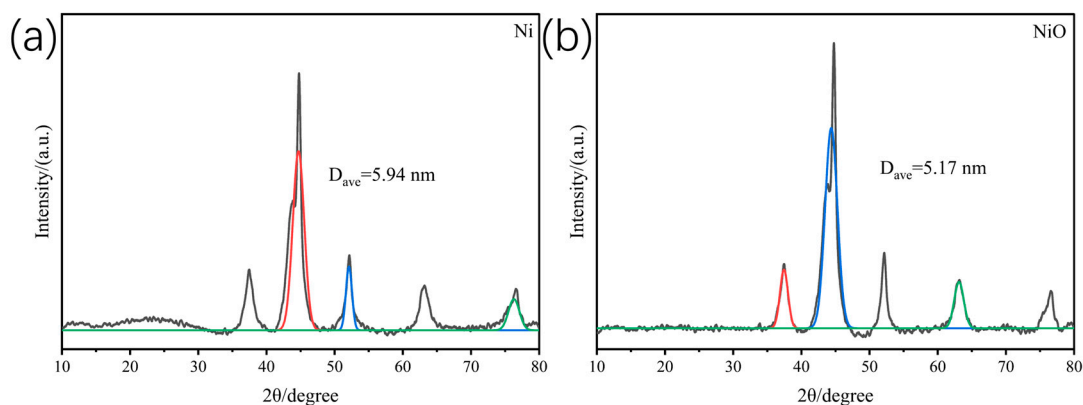

**Figure S2.** XPS survey scans of Ni/NiO@NC<sub>10,000-10-350</sub>.

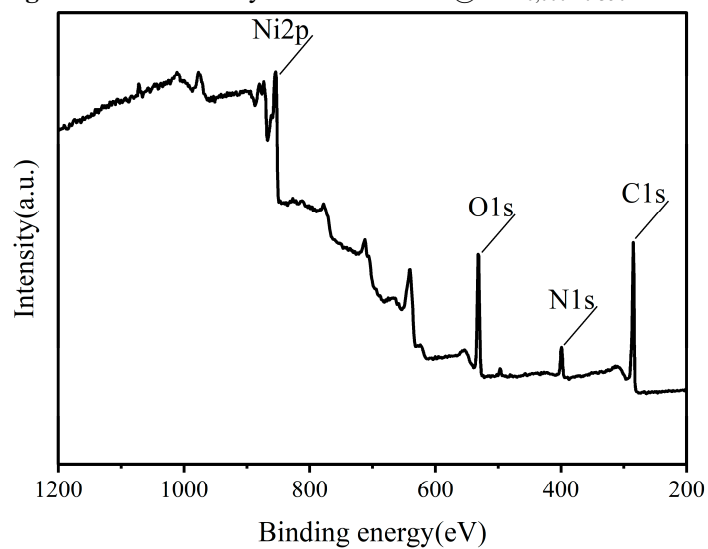

**Figure S3.** XPS spectra at C 1s regions.

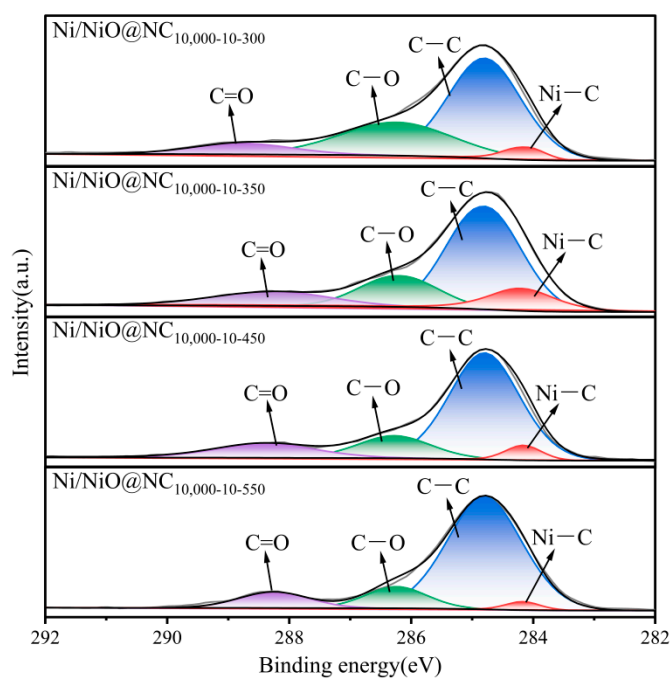

**Figure S4.** SEM-EDS pattern of Ni/NiO@NC<sub>10,000-10-350</sub>.

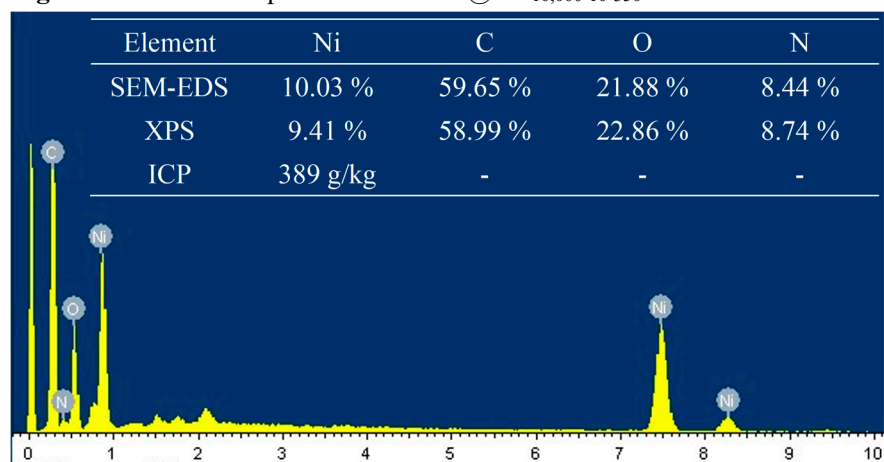

**Figure S5.** SEM images of the (a)Ni/NiO@NC<sub>8000-10-350</sub>, (b)Ni/NiO@NC<sub>30,000-10-350</sub>, (c)Ni/NiO@NC<sub>58,000-10-350</sub>.

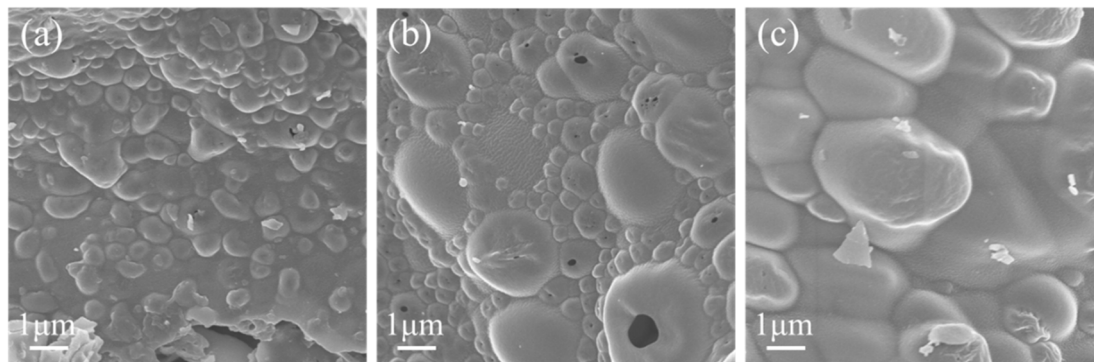

Supplement: s1 [file s1]
